# Supplementary material for: Genome-Resolved Metagenomics of the Chicken Gut Microbiome
Source: Front Microbiol. 2021 Aug 16;12:726923. doi: 10.3389/fmicb.2021.726923 (PMC8415551; doi:10.3389/fmicb.2021.726923)
Supplement: Supplementary Table 2 — General characteristics of MAGs, including completeness and contamination percentage based on CheckM, genome length, number of scaffolds, and scaffold N50. [file Table_2.XLSX]

## Sheet: Sheet1
Genome characteristics
MAG_ID	Completeness	Contamination	Strain heterogeneity	GC	Genome size (bp)	# scaffolds	Longest scaffold (bp)	N50 (scaffolds)	Mean scaffold length	totalDepth
MAG.100	89.45	1.45	40	0.602952	2427807	163	86606	24210	14894.5	28.0412
MAG.104	85.71	2.24	75	0.650787	2332478	216	46315	14475	10798.5	28.3837
MAG.106	93.43	0.48	100	0.270665	1655950	107	106745	34093	15476.2	23.5899
MAG.111	94.01	1.06	50	0.270035	1453482	128	35367	16358	11355.3	522.217
MAG.118	90.97	1.35	80	0.502556	2163026	206	57129	15435	10500.1	43.6141
MAG.121	94.94	1.42	100	0.486528	2924352	181	88015	22946	16156.6	33.0701
MAG.122	86.97	1.64	75	0.503381	2634428	351	40410	9936	7505.49	40.9418
MAG.123	94.38	0.13	100	0.335763	3014205	327	61084	12923	9217.75	24.8858
MAG.127	97.59	0.23	0	0.34919	2612676	117	127419	40736	22330.6	35.8335
MAG.128	96.4	1.89	100	0.445723	1763387	130	61612	17487	13564.5	64.5443
MAG.129	96.04	1.37	60	0.516756	3991602	266	79367	21590	15006	250.539
MAG.130	92.7	2.19	85.71	0.369028	1757687	173	52029	14361	10160	429.879
MAG.134	82.06	1.39	33.33	0.499395	2295618	317	29089	8571	7241.7	14.4068
MAG.135	92.99	3.01	42.86	0.460442	2721422	213	97979	20025	12776.6	32.5358
MAG.136	92.1	1.26	66.67	0.343338	1603197	167	66492	13158	9599.98	642.383
MAG.139	92.44	2.83	25	0.299115	3193849	410	48665	9550	7789.88	21.2899
MAG.140	94.82	5.78	18.18	0.606349	2755392	268	43004	14547	10281.3	40.5454
MAG.142	82.21	1.9	20	0.630819	1806073	190	49156	11818	9505.65	22.4056
MAG.143	94.38	0	0	0.496035	2558349	115	119884	33054	22246.5	48.2724
MAG.146	95.51	1.93	75	0.647758	2581938	150	96437	23090	17212.9	37.0536
MAG.147	89.44	1.23	66.67	0.570449	2239286	187	81482	16501	11974.8	70.6206
MAG.148	92.2	2.61	60	0.60717	2793088	209	58148	18629	13364.1	227.073
MAG.149	90.08	1	100	0.485558	3362989	241	68492	18852	13954.3	20.2788
MAG.152	82.36	1.75	50	0.520929	2196611	291	46786	9025	7548.49	124.048
MAG.16	89.92	4.69	11.11	0.2428	1210936	137	30995	11373	8838.95	13.6425
MAG.160	90.73	0.27	100	0.456296	1649922	98	125802	24380	16835.9	37.4897
MAG.17	93.75	3.96	25	0.547468	2975171	160	88071	27668	18594.8	30.4631
MAG.170	85.54	2.55	80	0.646231	2375617	415	35764	6718	5724.38	65.1997
MAG.172	90.85	1.64	75	0.263383	1752555	223	36986	10792	7858.99	3008.34
MAG.173	91.28	0	0	0.512768	1612769	55	120023	51671	29323.1	24.1741
MAG.175	98.58	0	0	0.527642	3134152	57	174240	80827	54985.1	66.5344
MAG.180	93.64	2.13	75	0.276133	3255212	417	57819	11324	7806.26	20.947
MAG.181	94.89	0.16	0	0.502739	3086593	286	49924	14690	10792.3	35.941
MAG.185	81.56	2.22	16.67	0.587911	2376516	245	55413	11796	9700.07	18.7138
MAG.191	86.02	2.68	20	0.296468	1255055	148	33737	11753	8480.1	162.943
MAG.193	86.22	0	0	0.381688	1914319	242	33766	9862	7910.41	14.1426
MAG.196	99.56	1.84	28.57	0.635006	1962581	65	115629	45653	30193.6	29.4597
MAG.197	88.86	0.67	100	0.58373	2272266	138	90742	26542	16465.7	33.6929
MAG.199	97.43	1.27	50	0.494154	2529063	180	109279	22889	14050.4	27.4429
MAG.2	92.91	0.78	100	0.543365	2831782	212	74130	17470	13357.5	39.354
MAG.20	98.8	0.64	50	0.563199	2252641	115	102902	34984	19588.2	19.6412
MAG.201	95.42	2.29	12.5	0.4301	2679098	178	78176	24743	15051.1	30.4702
MAG.206	99.98	1.13	0	0.277298	4263173	111	378151	77247	38407	58.7589
MAG.213	96.99	0.67	100	0.312752	2369279	57	222556	71349	41566.3	61.1191
MAG.215	90.43	3.36	81.82	0.594496	2332144	278	34600	10891	8389.01	19.7457
MAG.217	89.46	1.14	100	0.364183	1591427	186	38541	11287	8556.06	158.159
MAG.219	90.3	1.17	100	0.446484	3263591	431	53456	9158	7572.14	65.318
MAG.220	90.09	2.93	77.78	0.526226	2833207	357	45417	9739	7936.15	19.5991
MAG.221	80.08	2.07	50	0.592771	1446841	208	37750	8287	6955.97	27.6123
MAG.227	92.31	0.85	0	0.376484	2044197	20	392043	279078	102210	80.3194
MAG.235	96.98	0	0	0.548775	1945100	84	125522	33535	23156	128.206
MAG.236	98.62	0.34	33.33	0.294327	3733276	348	114443	15841	10727.8	15.9005
MAG.239	98.66	0	0	0.572418	2451287	48	436723	80303	51068.5	28.076
MAG.242	87.18	2.76	0	0.33847	1908173	225	40260	12592	8480.77	264.562
MAG.243	95.1	0.37	50	0.356688	3279252	251	84396	20508	13064.7	80.2198
MAG.244	92.95	0.91	0	0.634504	2194468	200	47288	16155	10972.3	35.2676
MAG.245	92.94	0.05	0	0.571714	1711165	63	133299	38618	27161.3	129.845
MAG.248	87.15	1.51	75	0.602365	1800122	252	41141	9744	7143.34	61.4208
MAG.25	96.84	1.01	100	0.552754	2969826	121	108661	42581	24544	21.7284
MAG.250	98.25	6.84	96.15	0.379045	3098419	234	75529	23576	13241.1	25.0123
MAG.251	96.94	0.82	100	0.536182	1605002	70	104710	30848	22928.6	16.0561
MAG.253	85.38	2.26	75	0.313569	1723421	315	24660	5581	5471.18	66.9557
MAG.259	93.95	1.68	70	0.402325	3252307	414	67488	10299	7855.81	33.2346
MAG.262	80.12	2.53	75	0.279691	1346731	188	35452	8874	7163.46	20.572
MAG.264	94.27	0.03	0	0.561052	1596564	47	124894	46868	33969.4	42.3818
MAG.267	87.78	1.34	0	0.461286	1999925	225	73224	11448	8888.56	13.9427
MAG.268	80.69	1.07	28.57	0.589371	1452823	192	76216	9742	7566.79	22.964
MAG.269	91.06	1.14	41.67	0.282823	3642108	440	42212	11046	8277.52	13.8138
MAG.272	97.92	2.18	25	0.43013	2630224	95	160880	56821	27686.6	24.4192
MAG.274	97.12	0.48	0	0.604366	2463252	38	208052	107064	64822.4	333.569
MAG.275	97.96	0	0	0.556331	2731419	43	317835	109162	63521.4	38.2498
MAG.28	85.23	0.34	0	0.58855	1754754	78	180487	36965	22496.8	36.1834
MAG.282	91.57	1.12	0	0.276854	1252683	96	48154	22592	13048.8	22.8281
MAG.284	96.23	0	0	0.535575	1887979	162	43563	16007	11654.2	34.2392
MAG.292	86.44	0.67	100	0.505375	2792468	265	42810	14536	10537.6	17.9648
MAG.293	97.32	0	0	0.449365	2076589	39	154438	69517	53245.9	33.6607
MAG.295	83.37	2.42	25	0.484342	1778661	284	26802	7480	6262.89	13.8588
MAG.296	95.75	0.67	0	0.458278	2053519	74	195860	56470	27750.3	37.4813
MAG.298	82.11	0.29	0	0.491137	2855926	150	115259	25857	19039.5	40.7363
MAG.299	95.83	0.63	100	0.472349	2882998	223	77740	19526	12928.2	38.067
MAG.3	97.33	0.11	0	0.389668	1601312	25	246607	96444	64052.5	165.414
MAG.304	86.06	4.23	42.86	0.305333	1250400	207	29212	7582	6040.58	21.5874
MAG.309	92.38	2.52	80	0.559794	1852554	217	49960	10294	8537.12	89.6558
MAG.31	95.04	3.38	62.5	0.582285	2428622	201	51185	16887	12082.7	32.0684
MAG.310	84.15	3.48	42.86	0.490427	2665042	327	51976	10085	8149.98	16.2655
MAG.314	89.61	0.76	50	0.454744	2655467	245	65958	14814	10838.6	57.3104
MAG.318	81.59	0	0	0.50161	1542574	200	29020	10688	7712.87	12.4894
MAG.319	99.37	0.32	100	0.561181	3425550	70	249284	80953	48936.4	50.307
MAG.321	93.04	0.84	100	0.511524	2614130	223	49971	16145	11722.6	17.9743
MAG.327	96.49	1.89	75	0.386094	3636528	294	68548	17741	12369.1	37.0639
MAG.33	99.63	0	0	0.367311	2824865	138	144121	39376	20470	293.575
MAG.334	86.63	0.84	50	0.597622	2241473	224	44282	14025	10006.6	27.7278
MAG.339	94.35	0.55	100	0.517826	1751245	77	76402	35540	22743.4	59.5379
MAG.34	92.89	2.01	60	0.481168	2434031	213	55424	13604	11427.4	108.962
MAG.340	96.66	1.95	0	0.487601	2949082	85	159431	60331	34695.1	161.958
MAG.343	98.95	0.52	0	0.324228	1891758	37	381233	138461	51128.6	172.92
MAG.35	92.26	1.69	0	0.265727	1238540	36	124452	48437	34403.9	34.3419
MAG.350	98.06	2.11	50	0.516919	3880909	192	68640	28584	20213.1	48.5087
MAG.355	85.39	2.36	25	0.335099	1127823	139	34547	10420	8113.83	58.1369
MAG.356	99.96	1.08	50	0.280244	2428445	201	55709	18053	12081.8	341.076
MAG.362	93.82	0.69	50	0.539616	4083317	236	116054	29440	17302.2	94.0729
MAG.366	98.66	0.34	0	0.288047	2282322	24	388064	135107	95096.8	115.352
MAG.367	83.1	4.36	85.71	0.578692	1999068	321	43183	7112	6227.63	50.7308
MAG.369	97.85	2.68	100	0.5031	2442701	146	81166	24888	16730.8	22.5497
MAG.372	88.24	2.44	100	0.47635	2345773	329	49253	8716	7130.01	41.3709
MAG.378	91.1	1.5	20	0.627897	2377390	133	267308	25958	17875.1	27.4406
MAG.381	93.85	0	0	0.542938	1775751	30	182176	95558	59191.7	138.494
MAG.382	93.5	0.95	100	0.585922	1651283	123	66152	20562	13425.1	119.597
MAG.385	96.73	1.61	50	0.452003	2472289	179	68259	20581	13811.7	62.3895
MAG.387	83.7	2.34	72.73	0.536081	2119778	312	35311	8310	6794.16	118.777
MAG.389	93.07	1.42	100	0.293428	2245597	309	36760	8534	7267.3	61.3738
MAG.39	89.13	3.31	85.71	0.611002	2215186	250	49684	11886	8860.74	31.5739
MAG.394	85.3	0	0	0.47258	2004338	144	60211	18570	13919	234.919
MAG.397	89.97	9.38	44.83	0.484117	3520064	191	120065	30523	18429.7	947.754
MAG.4	98.64	0.91	50	0.50267	2397534	111	108731	33956	21599.4	29.1275
MAG.40	95.67	0	0	0.259399	1555371	94	100183	28135	16546.5	127.119
MAG.400	85.61	0.81	100	0.53205	1841326	125	135720	19697	14730.6	74.5307
MAG.403	84.77	2.53	75	0.519705	2492837	348	38078	9117	7163.32	82.4751
MAG.404	92.64	2.53	50	0.432213	2554891	219	107155	18455	11666.2	24.4877
MAG.406	86.8	1.96	60	0.540118	2110490	277	38838	9499	7619.1	93.4227
MAG.409	93.33	3.48	87.5	0.52901	3121620	167	117058	32608	18692.3	26.9868
MAG.410	86.24	0.02	0	0.517889	1601479	109	129515	19071	14692.5	31.1331
MAG.418	98.64	1.59	25	0.333085	2791009	122	231065	53303	22877.1	61.0606
MAG.420	86.22	0.81	100	0.463753	1276986	197	25358	7899	6482.16	219.543
MAG.422	94.52	0	0	0.442119	2789299	214	69791	19534	13034.1	17.3586
MAG.43	85.01	5.42	100	0.412547	2631634	307	51418	11506	8572.1	35.523
MAG.45	87.65	0.24	0	0.596193	1633143	87	100537	29225	18771.8	37.9866
MAG.46	97.52	1.25	0	0.408277	1556501	123	80413	18385	12654.5	334.998
MAG.52	89.89	2.86	100	0.559397	3094976	371	35362	10036	8342.25	25.0548
MAG.57	90.47	0	0	0.573015	1650896	25	225561	93422	66035.8	39.3588
MAG.66	89.74	0	0	0.446587	2220648	203	52104	14088	10939.2	15.0252
MAG.69	98.66	0.67	0	0.439953	1902614	91	161052	30419	20907.8	10.4239
MAG.7	91.35	5.38	28.57	0.288948	1637470	123	59010	20321	13312.8	58.4512
MAG.70	83.08	5.89	28.57	0.47626	3277247	256	107088	19881	12801.7	28.3547
MAG.71	99.96	0.13	100	0.311927	3355068	56	272413	101450	59911.9	157.693
MAG.74	83.71	4.08	7.69	0.275044	1464335	116	61169	22263	12623.6	19.3385
MAG.78	98.91	0	0	0.387327	1951271	129	85429	23351	15126.1	327.771
MAG.8	91.31	2.01	60	0.541978	2755662	173	64474	23160	15928.7	20.3173
MAG.81	86.8	1.01	100	0.57889	1532135	61	105402	41892	25117	20.5642
MAG.82	91.28	1.01	50	0.494119	1771247	60	114364	51837	29520.8	19.4822
MAG.84	97.32	0.67	100	0.44716	2427180	141	61719	27589	17214	20.5867
MAG.88	90.84	1.69	72.73	0.583618	2058024	91	180422	39750	22615.6	37.704
MAG.89	97.32	0.67	0	0.552356	2610624	58	194509	63005	45010.8	38.7266
MAG.93	100	0	0	0.584864	3295257	23	434569	265380	143272	237.594
MAG.97	83.86	1.12	100	0.450548	1909914	359	23452	5856	5320.09	16.2142
MAG.99	97.32	0	0	0.459933	2007250	35	249500	113096	57350	118.468
MAG2.100	82.46	7.89	88.89	0.300033	1385817	184	32535	8672	7531.61	14.6282
MAG2.140	93.02	7.65	87.1	0.506116	3683132	308	103270	20865	11958.2	24.3449
MAG2.182	97.28	0.82	0	0.63562	2305349	83	102452	38773	27775.3	30.3945
MAG2.242	95.42	2.75	57.14	0.482037	2987388	124	104117	38604	24091.8	30.9001
MAG2.298	90.08	0.58	100	0.49526	2625146	190	56887	18994	13816.6	37.1989
MAG2.45	96.84	0	0	0.508506	3654672	117	128348	53138	31236.5	44.439
MAG2.55	95.94	0.76	33.33	0.641301	2158455	126	84339	25374	17130.6	27.5497
MAG2.60	95.09	1.59	66.67	0.596997	2799607	155	79892	25603	18062	23.1791
MAG2.85	86.43	1.76	0	0.648016	1867215	313	25036	6742	5965.54	19.4882
